# Supplementary material
Source: PubMed Central journal article supplement (PMC2838534)
Supplement: ddp587_1.pdf [file ddp587_1.pdf]

## Supplementary data

### METHODS

Primer sequences used to amplify all coding exons of MYBPC1 are shown below:

|        |                             |        |                             |
|--------|-----------------------------|--------|-----------------------------|
| ex1-F  | TTTCTCCCCAACTGCTTGTC        | ex1-R  | AAAAGATCGTTTTCTTAAATCATAGTG |
| ex2-F  | GGGGCTGTAGAAAGCAGTTC        | ex2-R  | CAAATCATGCTGGGATGGAC        |
| ex3-F  | CACCCCGTTGCTCATCAC          | ex3-R  | ATGGAGCCACCATGACAATC        |
| ex4-F  | TTCTCAGTTACTTGGGATGAAG      | ex4-R  | GCCTTTTCTTTTCTCTACCG        |
| ex5-F  | GAGGAGACAGGGTTTAGGGG        | ex5-R  | AAGACAAGGATTAGAATCAATACAGC  |
| ex6-F  | TTGGCTTTCTGACCCTTGTC        | ex6-R  | AGGGCCTAGGAGGAGAGG          |
| ex7-F  | GTCCCATGTCAACTCCTTCC        | ex7-R  | TGAAGTCTCTCAAAGCTGAACC      |
| ex8-F  | GACACAGCTTTAAGCCAATGC       | ex8-R  | CTTCTCCATCCCCTCACACC        |
| ex9-F  | CCCCACAGCCTATAAAGGAAC       | ex9-R  | TTGAAAATCCTCCACTTCTGTG      |
| ex10-F | GGAAATTGTTGTGTATGTCTCTGC    | ex10-R | TCTCTGAGTGGGTGTCTGAAAG      |
| ex11-F | CGTGGTCTCTAAGGGTCAGTG       | ex11-R | GGTTCACGGTCAAGGCTTTC        |
| ex12-F | AAAGGATAATTTGGAAGTTTTCTG    | ex12-R | TGTGACTTAAATGTTTACTCTCTCTCC |
| ex13-F | ATGTTTGCACCACTGCACTC        | ex13-R | CCAGTGTAGAGGAGCCTCAG        |
| ex14-F | GGCTCATGGGATAGGCTTTG        | ex14-R | CCTGTTCTATCAACTATGAAGGTCC   |
| ex15-F | GCAATAAGCAAGATGGACAAGG      | ex15-R | GCCCACTGAGAAGACATCTAAAG     |
| ex16-F | TGTGAAATGCCACCATCTTG        | ex16-R | TGGCTACCCTTCAAATATCCTC      |
| ex17-F | GTCAAGTGTCTTTTTCAGCTTGG     | ex17-R | CTGGCACCTTGCAAAACC          |
| ex18-F | GCCAGGCACCAACTATCTTG        | ex18-R | GGGGTAGGCAGTGTGTCTG         |
| ex19-F | GGAGACTCTGAAGTAGCCCTG       | ex19-R | CAACCCCAAATGGCTGAC          |
| ex20-F | CAGCCAAACCATATCATAAGC       | ex20-R | CATTTTGAATGCATAAAGTCACAG    |
| ex21-F | CAAATGCAAAATTTTAAGGACTTC    | ex21-R | CTCCTGCCACCTACAACCTC        |
| ex22-F | TGCCTTACACACATCCATGC        | ex22-R | GAAGGTGATGCGTTCTCAAG        |
| ex23-F | GTCCACCCATGTAGTCGGAG        | ex23-R | AACAACAAAATAGGAGGTTTTGAG    |
| ex24-F | TGCCATTTTGCTTTTGTAAAGG      | ex24-R | CACCTTCTAAACTAATCCAGCCC     |
| ex25-F | TCATAATGCTGAAGAAACATCTTG    | ex25-R | GGACAAGGACAATTCATCCC        |
| ex26-F | CTCCTGTAACAGAGGAAAGGG       | ex26-R | TTACCAGTGAGGCCCTTGTG        |
| ex27-F | CAGGTAGATAAATAGATGACAGACACC | ex27-R | TACTTCTTCCAGCCTCTGGG        |
| ex28-F | TTCAGGGAAGTTTTAATCATGTG     | ex28-R | GCAGCTGGATTTGTTTACATTG      |
| ex29-F | TCTGTCACTGGCTTTGATGG        | ex29-R | CATTTTGGCAAGCAATTTGG        |
| ex30-F | GCCCTCCTTAAAAGCGAATAG       | ex30-R | CACTGTATGCCATGAGCTGC        |
| ex31-F | AAGGATTAATGAAATCACCTCTTC    | ex31-R | ACTCCACAGGCTTGGTATGG        |
